# Supplementary material for: Rationally designed protein A surface molecularly imprinted magnetic nanoparticles for the capture and detection of Staphylococcus aureus
Source: Royal Society of Chemistry journal article supplement (doi:10.1039/d4tb00392f), 2024-01-01
Supplement: d4tb00392f1.pdf [file d4tb00392f1.pdf]

## Rationally designed Protein A surface molecularly imprinted magnetic nanoparticles for the capture and detection of *Staphylococcus aureus*

(Supplementary Information)

Kritika Narula<sup>a</sup>, Soumya Rajpal<sup>a</sup>, Snehasis Bhakta<sup>b</sup>, Senthilguru Kulanthaivel<sup>a</sup>, Prashant Mishra<sup>a\*</sup>

*Department of Biochemical Engineering and Biotechnology, Indian Institute of Technology Delhi, New Delhi, India*

*E-mail: [pmishra@dbeb.iitd.ac.in](mailto:pmishra@dbeb.iitd.ac.in)*

*b Department of Chemistry, Cooch Behar College, West Bengal, India*

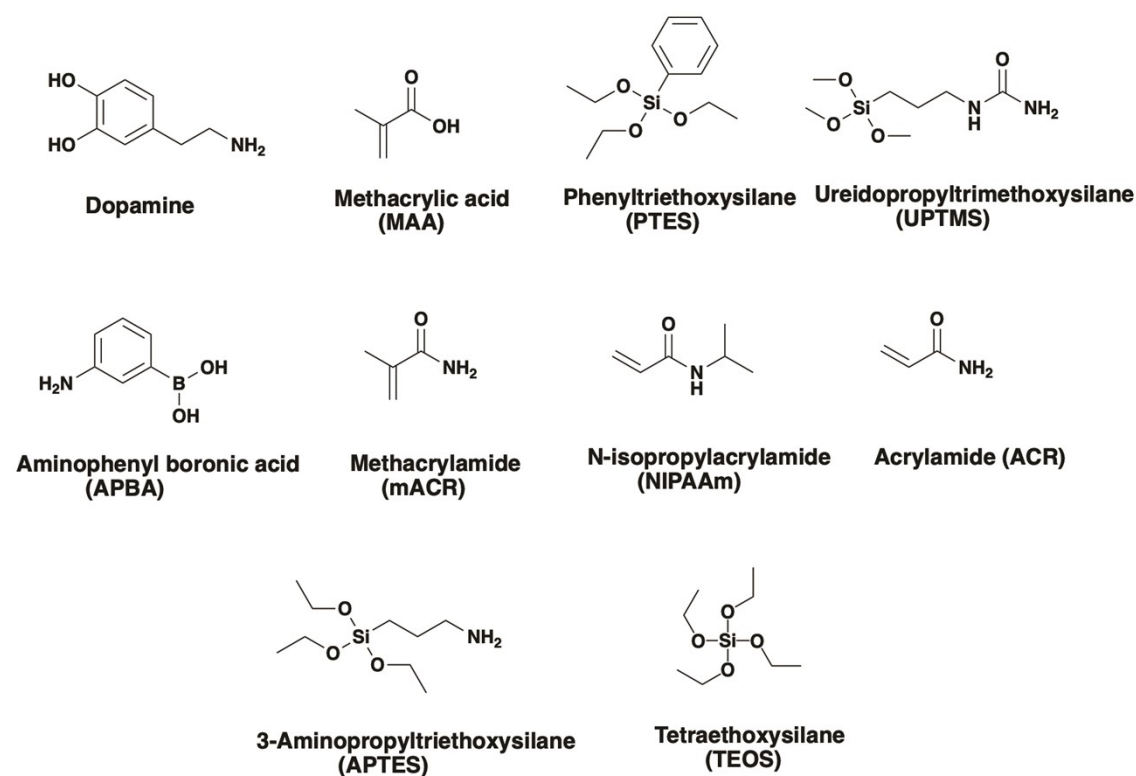

**Fig. S1** Complete set of monomers used for monomer screening using molecular docking.

**Table S1** Surface composition (in atomic percentage) of nanoparticles at different steps of molecular imprinting.

|                                      | Carbon | Oxygen | Silicon | Iron   |
|--------------------------------------|--------|--------|---------|--------|
| $\text{Fe}_3\text{O}_4$              | 36.413 | 48.368 | --      | 15.219 |
| $\text{Fe}_3\text{O}_4@\text{SiO}_2$ | 17.282 | 53.741 | 3.811   | 25.165 |
| APTES coating                        | 17.998 | 60.73  | 3.999   | 17.272 |
| Glutaraldehyde functionalization     | 28.13  | 52.061 | 3.479   | 16.33  |
| MIP                                  | 22.21  | 53.256 | 3.775   | 20.758 |
| NIP                                  | 18.833 | 48.487 | 4.931   | 27.749 |

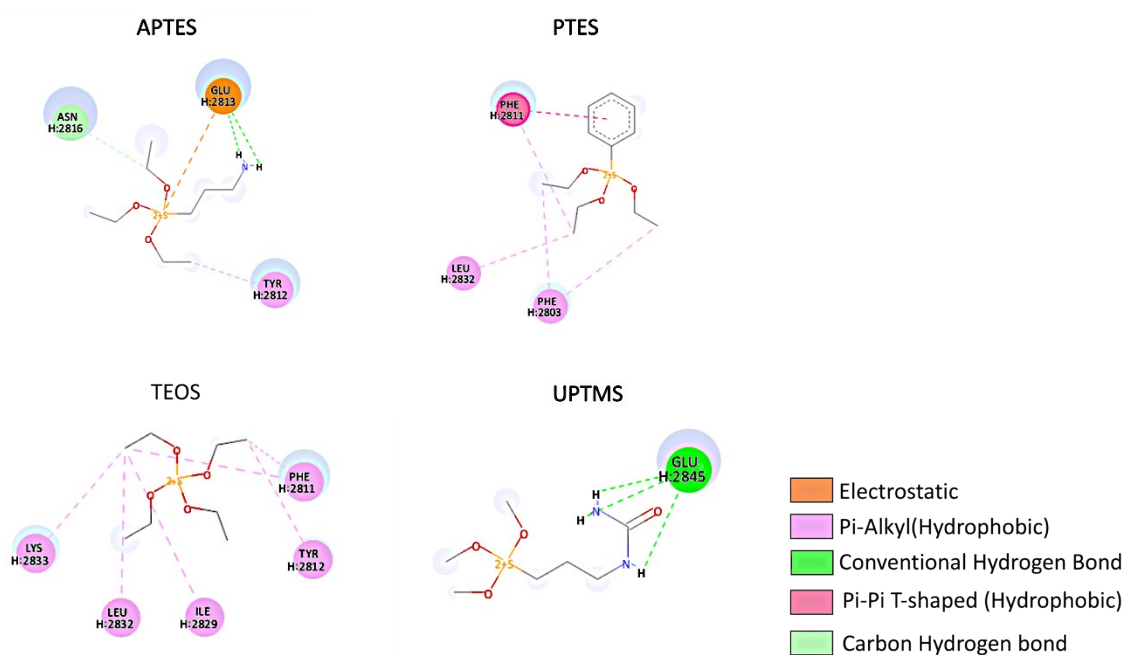

**Fig. S2** 2D-diagram representing interaction between selected monomers and the Protein

A

**Table S2** The fitting parameters for Langmuir, Freundlich and Hill equation model

| Model               | Parameters                      | MMIPs                                    | MNIP                            |
|---------------------|---------------------------------|------------------------------------------|---------------------------------|
| Langmuir isotherm   | Equation                        | $C_e/q_e = 1/(q_{max}K_L) + C_e/q_{max}$ |                                 |
|                     |                                 | $C_e/q_e = 0.17C_e - 0.50$               |                                 |
|                     | $q_{max}$ (mg g <sup>-1</sup> ) | 5.74                                     |                                 |
|                     | $K_L$ (mL mg <sup>-1</sup> )    | -0.34                                    |                                 |
|                     | $R^2$                           | 0.92                                     |                                 |
| Freundlich isotherm | Equation                        | $\ln q_e = (1/n)\ln C_e + \ln K_f$       |                                 |
|                     |                                 | $\ln q_e = 0.50\ln C_e + 1.16$           | $\log q_e = 0.64\ln C_e - 1.59$ |
|                     | $K_f$ (mg g <sup>-1</sup> )     | 3.18                                     | 0.09                            |
|                     | $n_f$                           | 1.99                                     | 0.76                            |
|                     | $R^2$                           | 0.94                                     | 0.82                            |
| Hill isotherm       | Equation                        | $q_e = q_{max} * x^n / (k^n + x^n)$      |                                 |
|                     | $q_{max}$                       | 10.93                                    |                                 |
|                     | $K_d$ (mg mL <sup>-1</sup> )    | 9.33                                     |                                 |
|                     | $n$                             | 15.21                                    |                                 |
|                     | $R^2$                           | 0.99                                     |                                 |

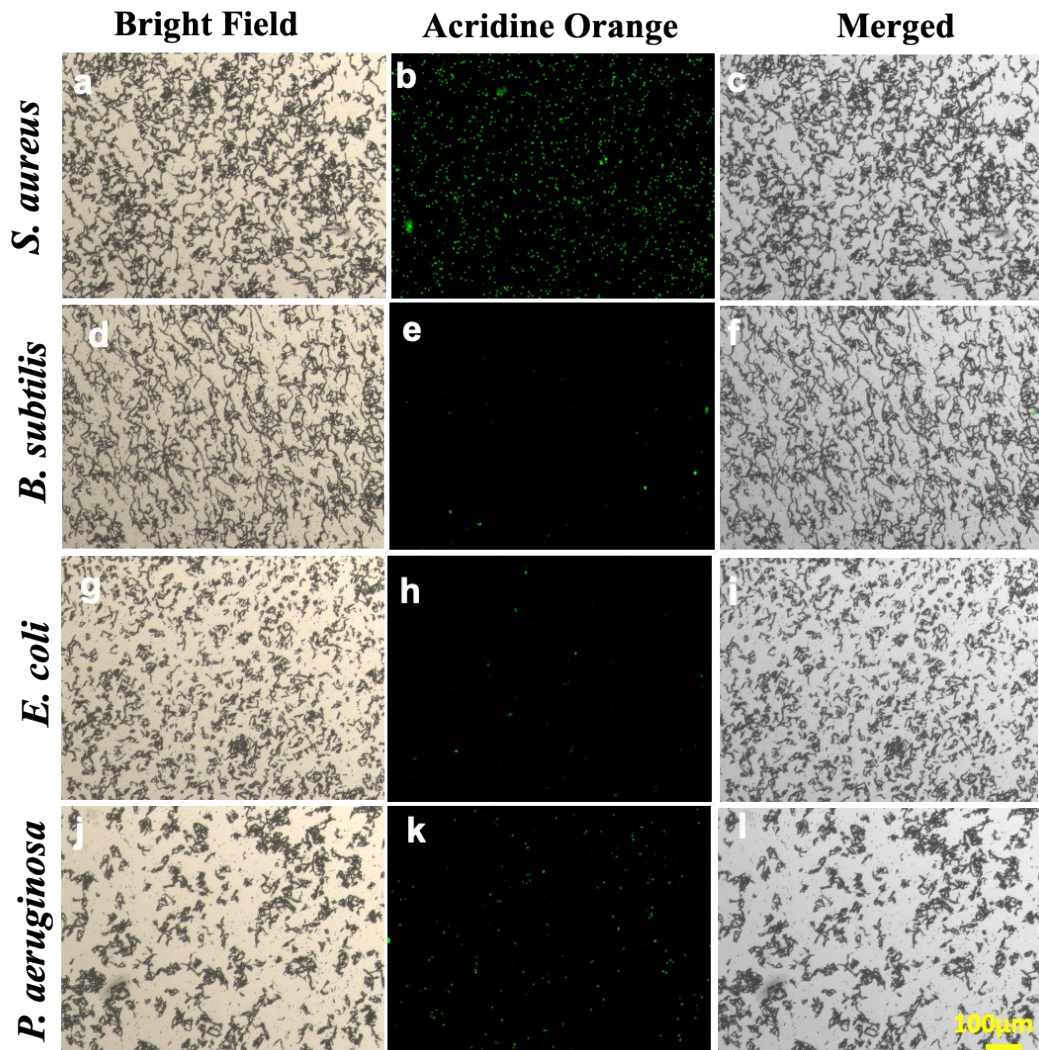

Fig. 53 Fluorescence microscope images of different bacteria treated with MIP. a), b) and c) show bright field, fluorescence, and merged image of *S. aureus* treated with MIP. d), e) and f) show bright field, fluorescence, and merged image of treated *B. subtilis* with MIP. g), h) and i) show bright field, Fluorescence, and merged image of treated *E. coli* with MIP. j), k) and l) showed bright field, Fluorescence, and merged image of treated *P. aeruginosa* with MIP.
